# Supplementary material for: Effect of soil coarseness on soil base cations and available micronutrients in a semi-arid sandy grassland
Source: Copernicus journal article supplement (doi:10.5194/se-7-549-2016), 2016-04-12

Supplement of Solid Earth, 7, 549–556, 2016  
<http://www.solid-earth.net/7/549/2016/>  
doi:10.5194/se-7-549-2016-supplement  
© Author(s) 2016. CC Attribution 3.0 License.

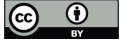

Solid Earth  Open Access

*Supplement of*

## **Effect of soil coarseness on soil base cations and available micronutrients in a semi-arid sandy grassland**

**Linyou Lü et al.**

*Correspondence to:* Ruzhen Wang (ruzhenwang@iae.ac.cn)

The copyright of individual parts of the supplement might differ from the CC-BY 3.0 licence.

**Fig. S1** Proportion of soil clay particles for 0-10 cm soil in different soil coarseness degrees of 0% sand addition (C0), 10% (C10), 30% (C30), 50% (C50) and 70% (C70). Data represent mean  $\pm$  SE (n=6). Letters indicate significant differences among treatments.

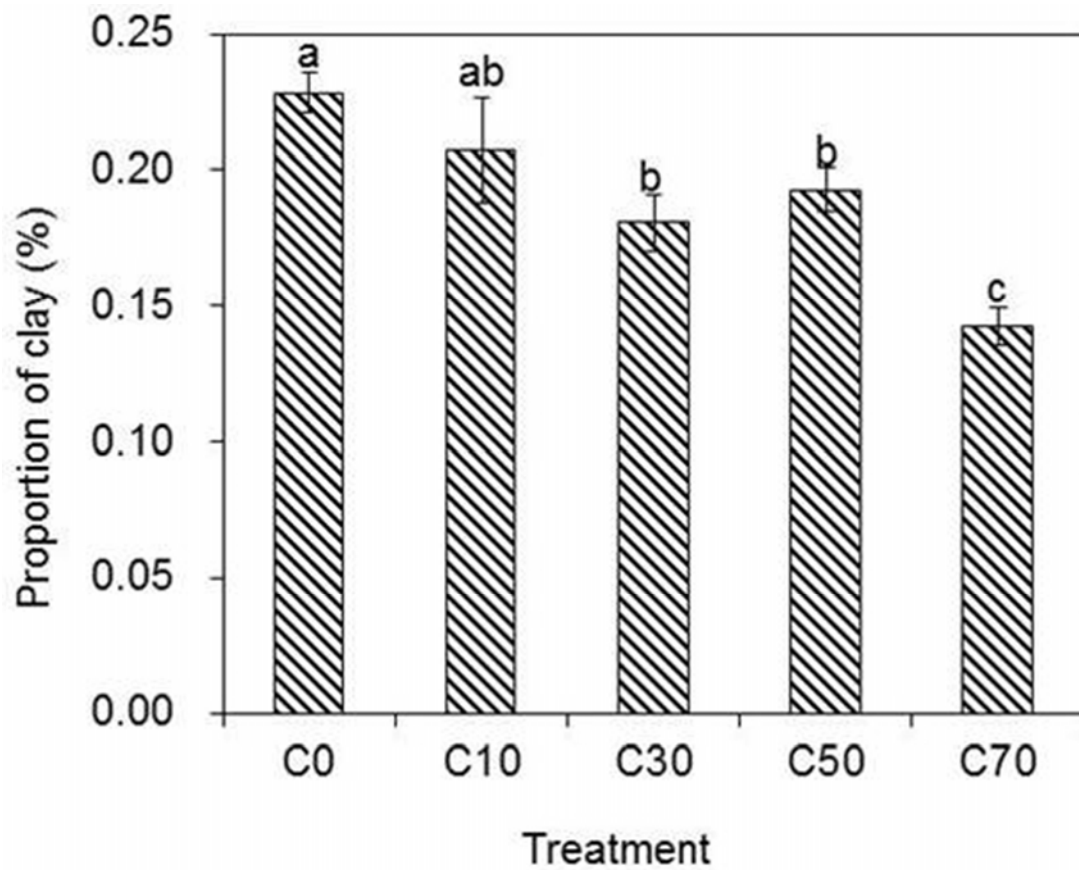

Supplement: Supplementary file 1 [file se-7-549-2016-supplement.pdf]
